# Supplementary material for: Shapeshifting: Ligation by 1,4-cyclohexadiene induces a structural change in Ag5+
Source: Royal Society of Chemistry journal article supplement (doi:10.1039/c2dt11876a), 2012-01-01
Supplement: c2dt11876a.pdf [file c2dt11876a.pdf]

**Electronic Supplementary Information for:**

## **Shapeshifting: Ligation by 1,4-cyclohexadiene induces a structural change in Ag<sup>5+</sup>**

**William A. Donald and Richard A. J. O'Hair\***

*School of Chemistry, Bio21 Institute of Molecular Science and Biotechnology, and ARC Centre of Excellence for Free Radical Chemistry and Biotechnology, University of Melbourne, Victoria, 3010 Australia. Fax: +61 3 9347 5180; Tel: +61 3 8344 2452; E-mail: rohair@unimelb.edu.au*

### **Table of Contents for Electronic Supplementary Information**

**Page S1.** Electronic Supplementary Information Title Page and Table of Contents.

**Page S2.** Table S1.

**Page S3.** Table S2.

**Page S4–S13.** Cartesian Coordinates of Optimized Molecular Geometries.

**Table S1.** Sequential gas-phase binding enthalpies of ethene to  $\text{Ag}_3^+$  at 0 K obtained from experiments (Exp.) and theory.

| <i>n</i> | 0 K $\Delta H_n$ , eV      |                  |                           |
|----------|----------------------------|------------------|---------------------------|
|          | Exp.<br>MKB <sup>a,b</sup> | Theory           |                           |
|          |                            | MKB <sup>b</sup> | This<br>Work <sup>c</sup> |
| 1        | 0.93                       | 0.72             | 0.84                      |
| 2        | 0.85                       | 0.61             | 0.73                      |
| 3        | 0.74                       | 0.48             | 0.59                      |
| 4        | 0.24                       | --               | --                        |

<sup>a</sup> Manard, M. J.; Kemper, P. R.; Bowers, M. T. *J. Am. Chem. Soc.* **2005**, *127*, 9994-9995. <sup>b</sup> Manard, M. J.; Kemper, P. R.; Bowers, M. T. *Int. J. Mass Spectrom.* **2006**, *249-250*, 252-262: Calculated using the B3LYP hybrid functional with the 6-31+G\*\* basis set for carbon and hydrogen, and a valence double-zeta basis set and a (5s6p4d)→[3s3p2d] contraction of the Hay-Wadt (*n* + 1) effective core potential for silver. <sup>c</sup> Calculated using computational method described in main text.

**Table S2.** Sequential gas-phase binding enthalpies of ethene to  $\text{Ag}_5^+$  at 0 and 298 K obtained from experiments (Exp.) and theory.

| <i>n</i> | 298 K $\Delta H_n$ , kJ/mol |                  |                           | 0 K $\Delta H_n$ , kJ/mol  |                  |                           |
|----------|-----------------------------|------------------|---------------------------|----------------------------|------------------|---------------------------|
|          | Exp.<br>MKB <sup>a,b</sup>  | Theory           |                           | Exp.<br>MKB <sup>a,b</sup> | Theory           |                           |
|          |                             | MKB <sup>b</sup> | This<br>Work <sup>c</sup> |                            | MKB <sup>b</sup> | This<br>Work <sup>c</sup> |
| 1        | 78.7                        | 58.1             | 62.9                      | 78.2                       | 53.3             | 64.4                      |
| 2        | 77.0                        | 51.2             | 58.9                      | 76.1                       | 46.3             | 55.6                      |
| 3        | 108.4                       | 45.1             | 56.4                      | 105.4                      | 37.4             | 58.6                      |
| 4        | 38.9                        | 18.3             | 23.0                      | 37.2                       | 15.0             | 23.8                      |
| 5        | 28.9                        | 11.3             | 15.5                      | 28.0                       | 8.7              | 10.9                      |
| 6        | 18.8                        | --               | --                        | 18.8                       | --               | --                        |

<sup>a</sup> Manard, M. J.; Kemper, P. R.; Bowers, M. T. *J. Am. Chem. Soc.* **2005**, *127*, 9994-9995. <sup>b</sup> Manard, M. J.; Kemper, P. R.; Bowers, M. T. *Int. J. Mass Spectrom.* **2006**, *249-250*, 252-262: Calculated using the B3LYP hybrid functional with the 6-31+G\*\* basis set for carbon and hydrogen, and a valence double-zeta basis set and a (5s6p4d)→[3s3p2d] contraction of the Hay-Wadt (*n* + 1) effective core potential for silver. <sup>c</sup> Calculated using computational method described in main text.

**Cartesian Coordinates of Optimized Molecular Geometries.** 0 K enthalpy values are in Hartrees and  $x,y,z$  coordinate values are in Angstroms.

**Ag<sub>3</sub><sup>+</sup> Global Minimum Structure (Figure 2, top left)**

0 K Enthalpy: -440.841631

|    |             |             |             |
|----|-------------|-------------|-------------|
| Ag | 1.36581784  | -0.78855530 | -0.00000000 |
| Ag | -0.00000000 | 1.57711060  | -0.00000000 |
| Ag | -1.36581784 | -0.78855530 | -0.00000000 |

**Ag<sub>3</sub><sup>+</sup>(cH) Global Minimum Structure (Figure 2, top right)**

0 K Enthalpy: -675.447167

|    |             |             |             |
|----|-------------|-------------|-------------|
| Ag | -2.24690000 | -1.03593800 | 0.04121200  |
| Ag | 0.43919900  | -0.40590200 | -0.11066700 |
| Ag | -1.52333800 | 1.53189000  | 0.02347000  |
| C  | 2.67148200  | -1.32240700 | 0.41299200  |
| C  | 3.33337800  | -0.50318400 | 1.49126100  |
| C  | 2.70335500  | -0.97557700 | -0.90541600 |
| H  | 2.29223900  | -2.30503600 | 0.68899200  |
| C  | 3.68998800  | 0.91036700  | 1.01342700  |
| H  | 4.24216400  | -1.04117200 | 1.79407300  |
| H  | 2.70583900  | -0.47523000 | 2.38770500  |
| C  | 3.43995800  | 0.23920700  | -1.42654100 |
| H  | 2.32959400  | -1.68527000 | -1.64168100 |
| C  | 4.35887800  | 0.86860800  | -0.36615800 |
| H  | 4.34411600  | 1.39353200  | 1.74229100  |
| H  | 2.77894500  | 1.52293300  | 0.96389700  |
| H  | 4.02142100  | -0.07233900 | -2.30046600 |
| H  | 2.72714000  | 0.97881900  | -1.81257400 |
| H  | 4.65598800  | 1.87075600  | -0.68236900 |
| H  | 5.27912200  | 0.27859300  | -0.29594500 |

**Ag<sub>3</sub><sup>+</sup>(cH)<sub>2</sub> Global Minimum Structure (Figure 2, lower)**

0 K Enthalpy: -910.04593

|    |             |             |             |
|----|-------------|-------------|-------------|
| Ag | 1.41399900  | -0.15379900 | -0.24582800 |
| Ag | -1.38475700 | -0.21872900 | -0.06614900 |
| Ag | -0.01569400 | 2.08606800  | 0.19059100  |
| C  | -3.33513200 | -1.54232300 | -0.84864100 |
| C  | -4.36977500 | -0.62637200 | -1.45187300 |
| C  | -3.24019500 | -1.77313500 | 0.48921500  |
| H  | -2.74418900 | -2.14988800 | -1.53173100 |
| C  | -5.03227900 | 0.27818500  | -0.40422300 |
| H  | -5.12436900 | -1.26167400 | -1.93560100 |
| H  | -3.92823600 | -0.03743700 | -2.26214600 |

|   |             |             |             |
|---|-------------|-------------|-------------|
| C | -4.18449200 | -1.16866200 | 1.50525300  |
| H | -2.56010300 | -2.54733500 | 0.84005500  |
| C | -5.41448900 | -0.52163200 | 0.84734400  |
| H | -5.91313300 | 0.75926500  | -0.83518900 |
| H | -4.34324000 | 1.08727200  | -0.12736600 |
| H | -4.49235300 | -1.96223100 | 2.19394300  |
| H | -3.65123900 | -0.44104600 | 2.12991100  |
| H | -5.92839300 | 0.11556900  | 1.57042900  |
| H | -6.12353100 | -1.30757700 | 0.56464300  |
| C | 3.20050100  | -1.86698300 | -0.02488000 |
| C | 3.90939000  | -1.69926700 | 1.29533200  |
| C | 3.51451800  | -1.13969400 | -1.13156300 |
| H | 2.51620700  | -2.70769800 | -0.12479500 |
| C | 4.72102300  | -0.39883600 | 1.35978800  |
| H | 4.57193000  | -2.56626300 | 1.42299300  |
| H | 3.19343900  | -1.76006600 | 2.12121800  |
| C | 4.63058000  | -0.11859600 | -1.16504700 |
| H | 3.05474800  | -1.40605800 | -2.08153100 |
| C | 5.53521700  | -0.19826700 | 0.07553500  |
| H | 5.37893400  | -0.41588300 | 2.23152500  |
| H | 4.04073200  | 0.45156300  | 1.50231900  |
| H | 5.21435100  | -0.28796700 | -2.07581900 |
| H | 4.21572900  | 0.89103300  | -1.27867200 |
| H | 6.14886700  | 0.70266100  | 0.14420000  |
| H | 6.22788900  | -1.03911000 | -0.04067800 |

**Ag<sub>3</sub><sup>+</sup>(1,4-cHD) Global Minimum Structure (Figure 3, upper panel, bidentate structure)**  
0 K Enthalpy: -674.243654

|    |             |             |             |
|----|-------------|-------------|-------------|
| H  | 2.53162600  | -2.20301000 | -1.21330700 |
| C  | 2.51057600  | -1.25874100 | -0.67567500 |
| C  | 2.66036100  | 0.00021600  | -1.49305500 |
| C  | 2.51012300  | -1.25880100 | 0.67616800  |
| C  | 2.51030000  | 1.25911300  | -0.67556800 |
| H  | 3.65977500  | 0.00034900  | -1.95319700 |
| H  | 1.96897000  | 0.00014600  | -2.34292100 |
| C  | 2.65937900  | 0.00008400  | 1.49380000  |
| H  | 2.53086100  | -2.20312900 | 1.21371000  |
| C  | 2.50989500  | 1.25902900  | 0.67634500  |
| H  | 2.53112300  | 2.20341500  | -1.21315000 |
| H  | 3.65848000  | 0.00015600  | 1.95462400  |
| H  | 1.96741800  | -0.00002900 | 2.34320400  |
| H  | 2.53042300  | 2.20328500  | 1.21402400  |
| Ag | -2.37025900 | -0.00009300 | 0.00018300  |
| Ag | -0.02260000 | -1.37017200 | -0.00024900 |
| Ag | -0.02293900 | 1.37012500  | -0.00025400 |

**Ag<sub>3</sub><sup>+</sup>(1,4-cHD) Lowest Energy Monodentate Structure (Figure 3, upper right structure)**

0 K Enthalpy: -674.241521

|    |             |             |             |
|----|-------------|-------------|-------------|
| H  | 2.48848000  | -2.12337900 | -1.21499000 |
| C  | 2.77964200  | -1.22240100 | -0.68030700 |
| C  | 3.36747600  | -0.08994900 | -1.48281400 |
| C  | 2.77954500  | -1.22250400 | 0.68016600  |
| C  | 3.52394100  | 1.16861900  | -0.66718300 |
| H  | 4.34944200  | -0.41660500 | -1.85876500 |
| H  | 2.77543300  | 0.09399500  | -2.38539800 |
| C  | 3.36731100  | -0.09018300 | 1.48291300  |
| H  | 2.48834100  | -2.12357300 | 1.21468000  |
| C  | 3.52385800  | 1.16851700  | 0.66749100  |
| H  | 3.67653300  | 2.09462100  | -1.21153300 |
| H  | 4.34925200  | -0.41689900 | 1.85887900  |
| H  | 2.77519300  | 0.09361500  | 2.38547500  |
| H  | 3.67637800  | 2.09444000  | 1.21199600  |
| Ag | -1.37448000 | 1.53163100  | -0.00000100 |
| Ag | 0.52375900  | -0.46903400 | -0.00006700 |
| Ag | -2.18395300 | -1.01087000 | 0.00002700  |

**Ag<sub>3</sub><sup>+</sup>(1,4-cHD)<sub>2</sub> Global Minimum Structure (Figure 3, middle panel)**

0 K Enthalpy: -907.633742

|    |             |             |             |
|----|-------------|-------------|-------------|
| H  | -2.70121700 | -2.60639400 | 0.91186400  |
| C  | -3.30107900 | -1.78256700 | 0.53240600  |
| C  | -4.15115700 | -1.02764800 | 1.52185400  |
| C  | -3.39695900 | -1.59037400 | -0.80859100 |
| C  | -4.81880800 | 0.17668100  | 0.90933500  |
| H  | -4.91221200 | -1.71977200 | 1.91369300  |
| H  | -3.56048200 | -0.74398500 | 2.40012100  |
| C  | -4.36326300 | -0.60758000 | -1.41862500 |
| H  | -2.87167500 | -2.26226900 | -1.48321000 |
| C  | -4.91375000 | 0.36487400  | -0.40730500 |
| H  | -5.25709800 | 0.89625000  | 1.59298400  |
| H  | -5.18542700 | -1.17964300 | -1.87530100 |
| H  | -3.89794400 | -0.07935000 | -2.25830900 |
| H  | -5.42950000 | 1.23742800  | -0.79446100 |
| Ag | -0.00003400 | 2.00163700  | 0.04979600  |
| Ag | -1.40159200 | -0.29325500 | -0.07564300 |
| Ag | 1.40151700  | -0.29320600 | -0.07530400 |
| H  | 2.70187800  | -2.60666500 | 0.91191500  |
| C  | 3.30157000  | -1.78277700 | 0.53234000  |
| C  | 4.15187900  | -1.02782700 | 1.52160200  |
| C  | 3.39691600  | -1.59037700 | -0.80861800 |
| C  | 4.81902700  | 0.17675600  | 0.90901300  |

|   |            |             |             |
|---|------------|-------------|-------------|
| H | 3.56145900 | -0.74438100 | 2.40011000  |
| H | 4.91321600 | -1.71985500 | 1.91305300  |
| C | 4.36287700 | -0.60735000 | -1.41889400 |
| H | 2.87144800 | -2.26224200 | -1.48311500 |
| C | 4.91345300 | 0.36514300  | -0.40764900 |
| H | 5.25736500 | 0.89635100  | 1.59259800  |
| H | 3.89720200 | -0.07912700 | -2.25838000 |
| H | 5.18501800 | -1.17922900 | -1.87582900 |
| H | 5.42884600 | 1.23787400  | -0.79487400 |

**Ag<sub>3</sub><sup>+</sup>(1,4-cHD)<sub>2</sub> Lowest Energy Bidentate Structure (Figure 3, lower panel)**

0 K Enthalpy: -907.629843

|    |             |             |             |
|----|-------------|-------------|-------------|
| H  | 3.97420100  | -1.76220100 | -1.18037800 |
| C  | 3.78406500  | -0.83409100 | -0.64813400 |
| C  | 3.68906300  | 0.42300800  | -1.47538700 |
| C  | 3.76811600  | -0.83012300 | 0.69923600  |
| C  | 3.33770500  | 1.64201000  | -0.66045900 |
| H  | 4.65613600  | 0.59490600  | -1.97028000 |
| H  | 2.97945800  | 0.29080000  | -2.30105300 |
| C  | 3.65383700  | 0.43166900  | 1.51676600  |
| H  | 3.94556500  | -1.75510400 | 1.24122400  |
| C  | 3.32214400  | 1.64602000  | 0.68687700  |
| H  | 3.19298200  | 2.57292400  | -1.20205400 |
| H  | 4.60885800  | 0.60619800  | 2.03363900  |
| H  | 2.92460900  | 0.30417500  | 2.32593700  |
| H  | 3.16504700  | 2.58012800  | 1.21944600  |
| Ag | -1.39703200 | -0.48360500 | -0.01774400 |
| Ag | 1.19986700  | -1.37761000 | -0.00245000 |
| Ag | 0.72174600  | 1.26214200  | -0.01376000 |
| H  | -4.55131600 | 2.42229900  | -1.12441500 |
| C  | -4.41249500 | 1.47574600  | -0.61205100 |
| C  | -4.27105400 | 0.24809100  | -1.47425700 |
| C  | -4.40581200 | 1.43569200  | 0.72066600  |
| C  | -3.79277000 | -0.95197300 | -0.69833700 |
| H  | -5.24049900 | -0.00268700 | -1.93100100 |
| H  | -3.60993800 | 0.44323400  | -2.32671100 |
| C  | -4.25663800 | 0.15872600  | 1.50652400  |
| H  | -4.53911400 | 2.34983300  | 1.29016100  |
| C  | -3.78650500 | -0.99269100 | 0.65558500  |
| H  | -3.57107300 | -1.85586100 | -1.26063200 |
| H  | -5.22168000 | -0.11885000 | 1.95699000  |
| H  | -3.58680200 | 0.30274300  | 2.36229500  |
| H  | -3.55969100 | -1.92859800 | 1.16053700  |

**Ag<sub>5</sub><sup>+</sup> Twisted Bowtie Structure (Figure 4, structure a)**

0 K Enthalpy: -734.93893

|    |             |             |             |
|----|-------------|-------------|-------------|
| Ag | 2.45823100  | 0.94732900  | 0.93403400  |
| Ag | 2.45979200  | -0.94668400 | -0.93343100 |
| Ag | 0.00010300  | -0.00079500 | -0.00050700 |
| Ag | -2.45892500 | 0.93788300  | -0.94293900 |
| Ag | -2.45920100 | -0.93773400 | 0.94284300  |

**Ag<sub>5</sub><sup>+</sup> Planar Bowtie Structure (Figure 4, structure b)**

0 K Enthalpy: -734.938146

|    |             |             |            |
|----|-------------|-------------|------------|
| Ag | -1.32813100 | 2.46231500  | 0.00000000 |
| Ag | 1.32813900  | 2.46239400  | 0.00000000 |
| Ag | -0.00001500 | -0.00000100 | 0.00000000 |
| Ag | -1.32813100 | -2.46241600 | 0.00000000 |
| Ag | 1.32813900  | -2.46229200 | 0.00000000 |

**Ag<sub>5</sub><sup>+</sup> Capped Tetrahedral Structure (Figure 4, structure c)**

0 K Enthalpy: -734.915275

|    |             |             |             |
|----|-------------|-------------|-------------|
| Ag | 1.68592900  | -1.00156200 | 0.98988500  |
| Ag | -0.32390100 | 0.98996200  | 1.01038600  |
| Ag | -0.32363600 | -0.99929800 | -1.00152400 |
| Ag | 1.66772600  | 1.01087600  | -0.99877100 |
| Ag | -2.70611800 | 0.00002300  | 0.00002300  |

**Ag<sub>5</sub><sup>+</sup> Trigonal Bipyramidal Structure (Figure 4, structure d)**

0 K Enthalpy: -734.912812

|    |             |             |             |
|----|-------------|-------------|-------------|
| Ag | -0.04093800 | -0.71329000 | 1.41563300  |
| Ag | -0.00510200 | 1.58280600  | -0.09231200 |
| Ag | 0.04698700  | -0.87153500 | -1.32600500 |
| Ag | -2.40153600 | -0.00311900 | -0.02360300 |
| Ag | 2.40058900  | 0.00513800  | 0.02628700  |

**Ag<sub>5</sub><sup>+</sup> (1,4-cHD) Global Minimum Structure (Figure 5, structure a)**

0 K Enthalpy: -968.340659

|   |             |            |             |
|---|-------------|------------|-------------|
| H | 2.19997500  | 3.28306200 | -1.21406500 |
| C | 1.25674800  | 3.22739600 | -0.67693700 |
| C | -0.00235900 | 3.35978400 | -1.49497800 |
| C | 1.25701100  | 3.22694800 | 0.67684700  |
| C | -1.26103400 | 3.22629400 | -0.67634100 |
| H | -0.00284000 | 4.35408900 | -1.96649100 |
| H | -0.00226900 | 2.65903900 | -2.33627800 |



|    |             |             |             |
|----|-------------|-------------|-------------|
| C  | -0.00174100 | 3.35866200  | 1.49554300  |
| H  | 2.20043000  | 3.28228100  | 1.21367000  |
| C  | -1.26073600 | 3.22574900  | 0.67743800  |
| H  | -2.20453800 | 3.28097800  | -1.21307400 |
| H  | -0.00212800 | 4.35258600  | 1.96784800  |
| H  | -0.00122300 | 2.65725400  | 2.33629900  |
| H  | -2.20395200 | 3.28008900  | 1.21472300  |
| Ag | -2.74060000 | -1.64840600 | -0.00035200 |
| Ag | 0.00085300  | -1.41546900 | 0.00052500  |
| Ag | 1.67818300  | 0.81406700  | -0.00042600 |
| Ag | -1.67900200 | 0.81240400  | 0.00005200  |
| Ag | 2.74246300  | -1.64553900 | -0.00005500 |

**Ag<sub>5</sub><sup>+</sup>(1,4-cHD) Lowest Energy Monodentate Structure (Figure 5, structure b)**  
0 K Enthalpy: -968.329598

|    |             |             |             |
|----|-------------|-------------|-------------|
| Ag | 3.14808500  | -0.55710600 | -1.32375500 |
| Ag | 3.13172100  | -0.60475200 | 1.32470700  |
| Ag | 0.85610800  | 0.36706100  | 0.00369500  |
| Ag | -1.91209400 | -0.21192400 | -0.05688200 |
| Ag | -1.03664400 | 2.32185800  | 0.04796100  |
| H  | -2.57886400 | -2.78239100 | 0.91746900  |
| C  | -3.36953600 | -2.15344800 | 0.51521600  |
| C  | -4.42059300 | -1.65896700 | 1.47528600  |
| C  | -3.47475800 | -1.99435900 | -0.82900000 |
| C  | -5.38189200 | -0.69194400 | 0.83344500  |
| H  | -4.96821100 | -2.53317200 | 1.85943400  |
| H  | -3.95420300 | -1.21620100 | 2.36265000  |
| C  | -4.65175800 | -1.30993500 | -1.47504700 |
| H  | -2.76681100 | -2.49811400 | -1.48285100 |
| C  | -5.48537000 | -0.53588100 | -0.48655200 |
| H  | -6.02542400 | -0.12536300 | 1.49833600  |
| H  | -5.26741000 | -2.08118200 | -1.96267800 |
| H  | -4.31957000 | -0.66516200 | -2.29661900 |
| H  | -6.21334500 | 0.15734800  | -0.89488400 |

**Ag<sub>5</sub><sup>+</sup>(1,4-cHD) Higher Energy Local Minimum Bidentate Structure (Figure 5, structure c)**  
0 K Enthalpy: -968.324061

|    |             |             |             |
|----|-------------|-------------|-------------|
| Ag | -3.30038200 | -0.95199900 | -0.90323300 |
| Ag | -3.28258900 | 0.96258400  | 0.91185900  |
| Ag | -0.78620000 | -0.00751200 | -0.00694700 |
| Ag | 1.64332700  | 0.93682200  | -0.95380100 |
| Ag | 1.64247300  | -0.94707700 | 0.94770300  |
| H  | 4.31394600  | 2.41497800  | -0.71434800 |
| C  | 4.30349400  | 1.36948700  | -0.41826500 |

|   |            |             |             |
|---|------------|-------------|-------------|
| C | 4.42056700 | 1.07375400  | 1.05512300  |
| C | 4.30758100 | 0.41019200  | -1.36350700 |
| C | 4.30617700 | -0.39509800 | 1.37279400  |
| H | 5.39416300 | 1.43902200  | 1.41350700  |
| H | 3.68370000 | 1.65196900  | 1.62588100  |
| C | 4.42894800 | -1.05809700 | -1.04550100 |
| H | 4.32143900 | 0.69073100  | -2.41323900 |
| C | 4.31017000 | -1.35436300 | 0.42766300  |
| H | 4.31796600 | -0.67545700 | 2.42257600  |
| H | 5.40415500 | -1.41964100 | -1.40316500 |
| H | 3.69528100 | -1.63951700 | -1.61725700 |
| H | 4.32615500 | -2.39980500 | 0.72392900  |

**Ag<sub>5</sub><sup>+</sup>(1,4-cHD) Higher Energy Local Minimum Bidentate Structure (Figure 5, structure d)**  
0 K Enthalpy: -968.316875

|    |             |             |             |
|----|-------------|-------------|-------------|
| Ag | 1.41522400  | -0.67071100 | 1.06322500  |
| Ag | -0.05511500 | 0.68368500  | -0.93696500 |
| Ag | -1.39941200 | -0.93695700 | 0.95151400  |
| Ag | 0.21620400  | -2.12985300 | -1.04352700 |
| Ag | -2.57294900 | 1.37948800  | -0.01419600 |
| H  | 2.87870000  | 1.50879500  | 2.45899500  |
| C  | 2.72914100  | 1.59520100  | 1.38616500  |
| C  | 1.85753000  | 2.72673300  | 0.89858800  |
| C  | 3.44523600  | 0.81604300  | 0.54335800  |
| C  | 1.55512200  | 2.64595400  | -0.57817700 |
| H  | 0.93644100  | 2.79650700  | 1.48378800  |
| H  | 2.38549500  | 3.67301000  | 1.09306200  |
| C  | 3.41342000  | 1.00039900  | -0.95258400 |
| H  | 4.17208500  | 0.11383400  | 0.94313400  |
| C  | 2.25366800  | 1.84638600  | -1.41868400 |
| H  | 0.84481200  | 3.36342600  | -0.97727700 |
| H  | 3.43010700  | 0.03504400  | -1.46632700 |
| H  | 4.34708200  | 1.49726400  | -1.25883600 |
| H  | 2.09479200  | 1.92221400  | -2.49092400 |

**Ag<sub>5</sub><sup>+</sup>(1,4-cHD) Higher Energy Local Minimum Bidentate Structure (Figure 5, structure e)**  
0 K Enthalpy: -968.314948

|   |             |            |             |
|---|-------------|------------|-------------|
| H | 2.19997500  | 3.28306200 | -1.21406500 |
| C | 1.25674800  | 3.22739600 | -0.67693700 |
| C | -0.00235900 | 3.35978400 | -1.49497800 |
| C | 1.25701100  | 3.22694800 | 0.67684700  |
| C | -1.26103400 | 3.22629400 | -0.67634100 |
| H | -0.00284000 | 4.35408900 | -1.96649100 |
| H | -0.00226900 | 2.65903900 | -2.33627800 |

|    |             |             |             |
|----|-------------|-------------|-------------|
| C  | -0.00174100 | 3.35866200  | 1.49554300  |
| H  | 2.20043000  | 3.28228100  | 1.21367000  |
| C  | -1.26073600 | 3.22574900  | 0.67743800  |
| H  | -2.20453800 | 3.28097800  | -1.21307400 |
| H  | -0.00212800 | 4.35258600  | 1.96784800  |
| H  | -0.00122300 | 2.65725400  | 2.33629900  |
| H  | -2.20395200 | 3.28008900  | 1.21472300  |
| Ag | -2.74060000 | -1.64840600 | -0.00035200 |
| Ag | 0.00085300  | -1.41546900 | 0.00052500  |
| Ag | 1.67818300  | 0.81406700  | -0.00042600 |
| Ag | -1.67900200 | 0.81240400  | 0.00005200  |
| Ag | 2.74246300  | -1.64553900 | -0.00005500 |

**Ag<sub>5</sub><sup>+</sup> (cH) Global Minimum Structure (Figure 5, bottom panel)**

0 K Enthalpy: -969.535741

|    |             |             |             |
|----|-------------|-------------|-------------|
| Ag | 3.12505700  | -0.77783400 | -1.30726200 |
| Ag | 3.20242900  | -0.53235600 | 1.32904700  |
| Ag | 0.91854000  | 0.38012200  | -0.02007800 |
| Ag | -1.86352700 | -0.09837100 | 0.15185900  |
| Ag | -0.91044600 | 2.39014800  | -0.16704200 |
| H  | -4.82372400 | 0.18808800  | -1.11771000 |
| C  | -5.28358000 | -0.80783600 | -1.06850300 |
| C  | -4.22430000 | -1.87767200 | -1.36634400 |
| C  | -5.90117100 | -1.02074900 | 0.31910500  |
| H  | -6.05672300 | -0.82828100 | -1.83979400 |
| C  | -3.29524500 | -2.10616900 | -0.20069000 |
| H  | -4.70840700 | -2.83788300 | -1.59128300 |
| H  | -3.65081900 | -1.62698800 | -2.26460500 |
| C  | -4.84074400 | -0.94398500 | 1.42974100  |
| H  | -6.68834600 | -0.28730900 | 0.50748700  |
| H  | -6.37886700 | -2.00631500 | 0.34869000  |
| C  | -3.56632800 | -1.66994700 | 1.05905700  |
| H  | -2.45009500 | -2.77438800 | -0.35600400 |
| H  | -4.61999900 | 0.10068900  | 1.68280400  |
| H  | -5.22437300 | -1.38507600 | 2.35560900  |
| H  | -2.91692600 | -1.98473300 | 1.87399900  |

**Ag<sub>7</sub><sup>+</sup> (Figure 6)**

0 K Enthalpy: -1029.048402

|    |             |            |             |
|----|-------------|------------|-------------|
| Ag | 0.88882800  | 2.62839500 | -0.19300800 |
| Ag | -1.83213300 | 2.08159100 | 0.20079400  |
| Ag | 0.00074500  | 0.00033900 | -0.00015500 |
| Ag | 2.72151900  | 0.54268500 | 0.19165600  |

|    |             |             |             |
|----|-------------|-------------|-------------|
| Ag | -2.71935700 | -0.54343300 | -0.20689400 |
| Ag | 1.83079600  | -2.08384700 | -0.19771000 |
| Ag | -0.89039800 | -2.62572900 | 0.20531800  |

**Ag<sub>9</sub><sup>+</sup> (Figure 6)**

0 K Enthalpy: -1323.153678

|    |             |             |             |
|----|-------------|-------------|-------------|
| Ag | 0.15327900  | -1.62339200 | -1.48780000 |
| Ag | -1.48300300 | 0.68082400  | -1.48747300 |
| Ag | 1.33069300  | 0.94511200  | -1.48704800 |
| Ag | 0.15234300  | -1.62508400 | 1.48679600  |
| Ag | -1.48357400 | 0.67970500  | 1.48840600  |
| Ag | 1.33012600  | 0.94352400  | 1.48794900  |
| Ag | -2.28443000 | -1.62124200 | -0.00141400 |
| Ag | 2.54606800  | -1.16757000 | 0.00012400  |
| Ag | -0.26150300 | 2.78812300  | 0.00046000  |

**Ag<sub>7</sub><sup>+</sup> (1,4,5,8-tetrahydronaphthalene) (Figure 6)**

0 K Enthalpy: -1417.220683

|    |             |             |             |
|----|-------------|-------------|-------------|
| C  | -0.00068600 | 3.17980700  | 0.67933500  |
| C  | 1.27947100  | 3.28503400  | 1.48337500  |
| C  | -0.00022200 | 3.18089300  | -0.67756800 |
| C  | 2.53826500  | 3.11989100  | 0.67607200  |
| H  | 1.30819500  | 4.27837700  | 1.95787400  |
| H  | 1.26434500  | 2.58153300  | 2.32349100  |
| C  | 1.28045700  | 3.28758100  | -1.48063300 |
| C  | 2.53871000  | 3.12104100  | -0.67276700 |
| H  | 3.47884300  | 3.13675000  | 1.22008700  |
| H  | 1.30948500  | 4.28178000  | -1.95332200 |
| H  | 1.26594700  | 2.58560100  | -2.32203300 |
| H  | 3.47965600  | 3.13874900  | -1.21611300 |
| Ag | 4.24220600  | -1.74107900 | 0.00166900  |
| Ag | 1.43799900  | -1.67258300 | -0.00157400 |
| Ag | 0.00004300  | 0.62076800  | -0.00234700 |
| Ag | 3.01718700  | 0.63644500  | 0.00041900  |
| Ag | -1.43785400 | -1.67270000 | -0.00180300 |
| C  | -2.53919800 | 3.12033800  | -0.67436200 |
| H  | -3.47979600 | 3.13785000  | -1.21831300 |
| C  | -1.28045200 | 3.28700900  | -1.48145400 |
| H  | -1.30952200 | 4.28106800  | -1.95443500 |
| H  | -1.26519300 | 2.58481400  | -2.32265500 |
| C  | -1.28136000 | 3.28467500  | 1.48261900  |
| H  | -1.31060200 | 4.27795600  | 1.95720600  |
| H  | -1.26661900 | 2.58108600  | 2.32266600  |
| Ag | -4.24182200 | -1.74144300 | 0.00240400  |

|    |             |            |             |
|----|-------------|------------|-------------|
| Ag | -3.01704300 | 0.63621900 | -0.00019500 |
| C  | -2.53962300 | 3.11934500 | 0.67449200  |
| H  | -3.48056200 | 3.13630000 | 1.21788800  |

**Ag<sub>9</sub><sup>+</sup>(1,4,5,8,9,10-hexahydroanthracene) (Figure 6)**  
0 K Enthalpy: -1866.092955

|    |             |             |             |
|----|-------------|-------------|-------------|
| C  | -1.28138300 | 3.09986900  | 0.67638800  |
| C  | 0.00023500  | 3.19706000  | 1.47279000  |
| C  | -1.28152500 | 3.10015000  | -0.67560500 |
| C  | 1.28169000  | 3.09965200  | 0.67609500  |
| H  | 0.00040400  | 4.16743300  | 1.99482700  |
| H  | 0.00029100  | 2.45538700  | 2.28137800  |
| C  | -0.00008100 | 3.19764000  | -1.47224600 |
| C  | 1.28154900  | 3.09990800  | -0.67586600 |
| H  | -0.00001800 | 4.16821600  | -1.99390500 |
| H  | -0.00022400 | 2.45627900  | -2.28111900 |
| Ag | 2.96870000  | -1.78625700 | -0.00016500 |
| Ag | 0.00011100  | -1.85254300 | -0.00050100 |
| Ag | -1.45035200 | 0.44943400  | 0.00003000  |
| Ag | 1.44964200  | 0.44833400  | -0.00053300 |
| Ag | -2.96825700 | -1.78553800 | -0.00008200 |
| C  | -3.82009300 | 3.08276100  | -0.67300300 |
| H  | -4.76071500 | 3.12076200  | -1.21582400 |
| C  | -2.55888100 | 3.20644100  | -1.48395500 |
| H  | -2.57108000 | 4.18621600  | -1.98632400 |
| H  | -2.55655800 | 2.47889100  | -2.30412900 |
| C  | -2.55856700 | 3.20581600  | 1.48505600  |
| H  | -2.57066400 | 4.18537400  | 1.98785100  |
| H  | -2.55606100 | 2.47791400  | 2.30491700  |
| Ag | -5.80777300 | -1.68887000 | 0.00005600  |
| Ag | -4.40966000 | 0.58908700  | 0.00020000  |
| C  | -3.81994800 | 3.08247500  | 0.67431900  |
| H  | -4.76045600 | 3.12024100  | 1.21735600  |
| C  | 3.82024600  | 3.08197900  | 0.67352900  |
| H  | 4.76088600  | 3.11974400  | 1.21633100  |
| C  | 3.82010500  | 3.08220700  | -0.67382100 |
| H  | 4.76063600  | 3.12016700  | -1.21680300 |
| Ag | 4.40883600  | 0.58917200  | -0.00070400 |
| Ag | 5.80858000  | -1.68766000 | 0.00113000  |
| C  | 2.55872000  | 3.20599000  | -1.48451400 |
| H  | 2.57093600  | 4.18576400  | -1.98688600 |
| H  | 2.55613500  | 2.47843200  | -2.30467300 |
| C  | 2.55903200  | 3.20541700  | 1.48452100  |
| H  | 2.57133600  | 4.18497800  | 1.98730500  |
| H  | 2.55663100  | 2.47751200  | 2.30437400  |
